Development of the Advised Protocol for OCT Study Terminology and Elements Anterior  
Segment OCT extension reporting guidelines: APOSTEL-AS

Authors:

Ameenat L Solebo: Population, Policy and Practice Department, UCL GOS Institute of Child Health, London, UK; Great Ormond Street Hospital, London, UK, Great Ormond Street

NIHR Biomedical Research Centre, Moorfields NIHR Biomedical Research Centre

Edmund Tsui: Ocular Inflammatory Disease Center, UCLA Stein Eye Institute, David Geffen School of Medicine at UCLA, Los Angeles, California

Alastair K Denniston: Institute of Inflammation and Ageing, and Centre for Patient Reported Outcomes Research (CPROR), Institute of Applied Health Research, Birmingham Health Partners for Regulatory Science and Innovation, NIHR Birmingham-Oxford Blood and Transplant Research Unit (BTRU) in Precision Transplant and Cellular Therapeutics, University of Birmingham, University Hospitals Birmingham, Health Data Research UK, London, UK

Axel Petzold: University College London, UCL Institute of Neurology, London UK; Moorfields Eye Hospital, London UK

Alex S Huang: Hamilton Glaucoma Center, The Viterbi Family Department of Ophthalmology, Shiley Eye Institute, University of California, San Diego, CA, USA

## **Abstract:**

### Background:

Anterior segment optical coherence tomography (AS-OCT) is emerging as a valuable diagnostic, monitoring and predictive tool across a range of disorders. Clinical utility of quantitative information derived from AS-OCT has been suggested for ophthalmic disorders such as glaucoma, corneal disease and uveitis, which taken together comprise the majority of the blinding conditions affecting working age individuals. The current absence of guidelines for reporting OCT studies which quantitatively assess the anterior segment is an obstacle to reproducibility and interoperability. In order to provide this guidance, we aim to extend the existing Advised Protocol for OCT Study Terminology and Elements (APOSTEL) guidelines, to enable inclusion of items applicable to AS-OCT.

### Methods

The guideline will be developed through a staged consensus process involving literature review and Delphi consensus exercise across an international multi-disciplinary stakeholder committee. A systematic scoping review will be used to generate candidate items for the guideline extension, and to form the expert membership base (eye healthcare professionals, patients, methodologists, statisticians, computer scientists, industry representatives, health informaticists, and journal editors) of the consensus group. The candidate reporting items will be presented to consensus group members, alongside the existing APOSTEL items, in a Delphi consensus exercise. Members will be asked to vote on each item using a 9-point scale, and to provide explanatory notes. Aggregated responses will be presented at the second Delphi round, and anonymous electronic voting will be used to include or exclude existing, reworded or amended, or newly suggested items. Items achieving consensus (>80%) will be included. Any item not achieving consensus but which is approved by the majority (51-80%

inclusive) will be considered for further amendment or refinement and representation in a subsequent round. The resultant APOSTEL-AS guideline will undergo piloting, with feedback from this pilot used to produce the final version.

## Discussion

AS-OCT is increasingly being used to derive quantitative data from images of normal physiology and for disease involving the anterior segment of the eye. Through APOSTEL-AS, we seek to provide timely support for researchers to ensure future standardisation, interoperability and reproducibility of reported work.

## Background

Optical coherence tomography (OCT) has changed the face of ophthalmic clinical practice and eye and vision, and broader medical research. Research and clinical utility has been demonstrated for ocular OCT biomarkers within the field,<sup>1-3</sup> and beyond the eye.<sup>4</sup>

Quantitative data from posterior segment ocular OCT, such as retinal nerve fibre layer or central macular thickness, have been used as diagnostic, predictive, prognostic and monitoring biomarkers for inflammatory, degenerative, vascular, and metabolic disorders.<sup>4-7</sup>

The validation and adoption of these biomarkers has been enabled by the standardisation and harmonisation of the reporting of research findings within the underpinning evidence base.

The 2016 and 2021 Advised Protocol for OCT Study Terminology and Elements

(APOSTEL) and APOSTEL2.0 recommendations<sup>8,9</sup> for reporting quantitative retinal OCT studies strengthened reproducibility and interoperability across OCT studies of the posterior segment of the eye. However, some aspects of the current APOSTEL guidance are not applicable to anterior segment OCT (AS-OCT) studies. AS-OCT is being used to derive quantitative data from images of the normal physiology of the anterior ocular structure, data which carry clinical utility for the diagnosis and management of diseases involving those structures. These diseases include corneal pathology, glaucoma, cataract and anterior uveitis.<sup>10-14</sup> Taken together, these ‘anterior segment’ involving disorders constitute the most common causes of working aged blindness globally.<sup>15</sup>

In order to improve the reproducibility and interoperability of AS-OCT studies, we aim to develop a checklist of the core information that should be provided when reporting

quantitative OCT studies which quantitatively assess AS OCT structures. This checklist will be developed as an extension to the current APOSTEL recommendations.<sup>8</sup>

## Methods

APOSTEL-AS will be registered as a reporting guideline under development on the EQUATOR library of reporting guidelines, and will be developed in accordance with the EQUATOR Network's methodological framework. A steering group with representation of expertise in corneal, lens, glaucoma and uveitic disorders, and including investigators involved in developing the APOSTEL guidelines, will be formed to oversee the conduct and methodology of the study.

### Literature review and candidate item generation

An initial list of candidate items for the APOSTEL-AS checklist will be generated through review of the published literature and consultation with the steering group. A search will be performed using the terms "anterior segment optical coherence tomography" (supplemental document, search terms) to identify eligible studies. Eligibility criteria comprise publications reporting the analysis of quantitative data derived from AS-OCT acquired from human eyes of live participants. Specific considerations for AS-OCT will be identified from these studies and extracted using a specific data collection form developed de novo by the steering group. Screening, selection and data extraction to the data collection form (DCF) will be undertaken independently by at least two investigators. Items will be reframed as candidate reporting items ahead of the consensus process. The DCF will include a consensus nomenclature for ocular anterior segment structures as visible on axial cross section imaging of the globe. This consensus nomenclature will be developed and agreed upon by the APOSTEL steering group

using the nominal group technique, with nomenclature agreed on through discussion and majority voting.

Delphi consensus group membership:

Membership of the Delphi Group will be informed by the findings of the systematic review.

Corresponding authors of studies reporting quantitative anterior segment OCT results

published within 36 months prior to our initial survey will be contacted by email, requesting a response within 6 weeks. Reminder emails will be sent 3 weeks later. A record will be kept of contact (emails not returned as undelivered) and response rates. Other stakeholders to be identified and invited by the steering group to join the Delphi consensus group comprise: eye healthcare professionals, patients, methodologists, statisticians, computer scientists, industry representatives, health informaticists, and journal editors. Experts will be allowed one round of snowball recruitment (ie, invited to suggest additional experts). Records will be kept of all those contacted, either directly by the steering group or as corresponding authors, or indirectly through snowball recruitment.

Online Questionnaire 1 (Delphi 1):

Participants will be given written information about the study and asked to state their level of expertise (using years active and publications disseminated) within (a) AS-OCT image acquisition, (b) quantitative analysis of AS-OCT (c) anterior segment disorders, and (d) any other qualifications or relevant experience, as well as (e) any potential conflicts of interest.

The candidate reporting items generated by the systematic review will be presented to consensus group members, alongside the existing APOSTEL 2.0 items. Members will be asked to vote on each item using a 9-point scale: (1-3) not important, (4-6) important but not critical, and (7-9) important and critical. They will also be asked about their agreement on

each item, rating from 1 (full disagreement) to 4 (full approval), and given the opportunity to submit free text comments about the candidate items and to suggest additional items.

OQ2 (Expert Group virtual meeting): We will then form a panel of experts (the steering group, and selected members of the expert group, ensuring representation of all stakeholder groups) who will gather at a virtual meeting. The aggregated results of the initial questionnaire (median and interquartile ranges of Delphi scores from each item, and comments made by participants) will be reviewed by the panel. Following open discussion of Delphi results, anonymous electronic voting will be used to include or exclude each existing, reworded or amended, or newly suggested item. An 80% threshold will be used to demonstrate majority consensus for inclusion.

OQ3 (Delphi 2): The included items will be considered in a second Delphi round by the original Delphi group. In this round, participants will be asked to approve or reject the list of APOSTEL-AS items. Items achieving consensus >80% will be included. Any item which does not achieve consensus but is approved by the majority (51-80% inclusive) will be reconsidered by the expert group for consideration for further amendment or refinement and representation in a subsequent Delphi round.

OQ4 (Delphi 3): Those items which reached majority consensus but did not achieve the 80% consensus threshold will be represented to the Delphi Group following amendment by the steering group for one final Delphi round. Participants will again be asked to approve or reject the items. Items achieving consensus >80% will be included. Any item which does not achieve consensus but is approved by the majority (51-80% inclusive) will be reconsidered

within subsequent Delphi rounds (OQ5+) by the expert group for consideration for further amendment or refinement prior to inclusion in the penultimate list.

#### Guideline pilot

The penultimate guideline will be checked by the Operations Team (ALS & TBC) to ensure clarity. It will then be presented to at least 5 stakeholders for piloting. The stakeholders participating in this pilot will comprise Delphi participants who were not part of the expert group, or additional external experts identified following the start of the Delphi process. The Operations team will use feedback from this pilot to refine the guideline and produce the final version of the checklist.

Ethics approval will be sought from the UCL ethics review committee. Informed consent electronic consent will be obtained from Delphi participants and consensus meeting participants.

#### Discussion:

The APOSTEL-AS recommendations will be an extension to the current APOSTEL guidelines, adding specific parameters for the reporting of AS-OCT data. AS-OCT is increasingly being used to derive quantitative data from images of normal physiology and for disease involving the anterior segment of the eye. There are several differences in the acquisition and analysis of anterior versus posterior segment OCT. Whilst posterior segment OCT (PS-OCT) concerns images of tissues typically no more than 1mm in depth (as measured from the inner limiting membrane to the sclera), with the 'en face' area of interest typically being 4mm<sup>2</sup>, the ocular structures imaged in AS-OCT are arranged over a greater depth (at least 10mm, as measured from the corneal epithelium to the anterior hyaloid area)

with a much wider area of interest depending on the clinical or research need.<sup>16</sup> Furthermore, whilst the posterior segment tissues minimally scatter light, there are unique features related to light transmissibility of the different anterior ocular structures, from the optically optimised cornea to the impenetrable sclera and cornea.<sup>16</sup> These considerations differentiate AS-OCT from PS-OCT, but it is also likely that these challenges result in heterogeneity of study methods, including acquisition processes, image quality assessment, data extraction and image analysis across the AS-OCT literature. APOSTEL-AS will provide timely support for researchers to ensure future standardisation, interoperability and reproducibility of reported work.

A possible limitation of the approach described in this protocol is the restriction of the identification of potential consensus group members to those researchers who have published eligible studies within the preceding 4 years. High impact, novel, innovative imaging studies may require lengthy recruitment periods, which may mean that our time limited approach fails to involve scientists whose work is not yet disseminated through peer reviewed publications. The use of ‘snowball’ extension, ie asking members to identify other potential members, should address this limitation. The strengths of the approach include the involvement of a wide range of stakeholder expertise and experience, with collection of the degree of experience and expertise to enable contextualisation of responses. Development of items will be underpinned by a comprehensive systematic review, with collection of data from manuscripts published over the last 20 years. This comprehensiveness may result in the collection of historical data from imaging platforms which are no longer in use due to being superseded by more modern platforms.

Several consensus methods exist for the capture and description of consensus across multi-disciplinary groups. The nominal group technique (NGT) selected for the initial activities of the Delphi steering group, with its structured sequence of events, principal of equal participation, and promotion of diversity in opinion, should support the work of this smaller group.<sup>17</sup> NGT consensus exercises can be time consuming, particularly for large groups, but this work will benefit from facilitation undertaken by subject matter experts with experience in supporting consensus work.<sup>18,19</sup> The selection of the Delphi method for the development of the checklist enables this activity to be undertaken by a large, geographically and scientifically diverse group with different degrees and spheres of experience and expertise. A recently published EQUATOR (Enhancing the Quality and Transparency Of health Research) guideline for reporting consensus-based methods in biomedical research and clinical practice (the ACCurate COnsensus Reporting Document, or ACCORD) will be used to report study findings.<sup>17</sup>

The original APOSTEL checklist was developed following concerns around the absence of consensus around quality control criteria for posterior segment OCT imaging.<sup>9</sup> Similar concerns are emerging for AS-OCT imaging, with recognition of this issue being a particular obstacle to the potentially transformative role of artificial intelligence approaches to image analysis and the development of imaging based diagnostic or biomarkers.<sup>20,21</sup> These AI approaches hold the promise of dramatically increasing the utility of clinical images, with deep learning (DL) based image analysis in particular proving non-inferior to expert human assessment.<sup>12</sup> Human analysis of the quantitative information which can be extracted from anterior segment structures is subjective, open to inter- and intraobserver variability, and time consuming.<sup>22</sup> DL image analysis methods would provide objective, repeatable, reliable OCT biomarkers, but these approaches require large (or harmonised), diverse, annotated datasets.

The current absence of explicit and comprehensive reporting of AS-OCT study methods is an obstacle to comparison or collation of existing annotated imaging datasets. Through the wide dissemination and uptake of the APOTEL-AS guidance, enabled by ensuring accessibility in open access formats and translation into other languages as directed and supported by stakeholders, this obstacle should be addressed.

## Acknowledgments

J Mehta; A Invernizzi, and the remaining members of the growing APOSTEL-AS Delphi group

## References

1. Hui, V. W. K. *et al.* Optical Coherence Tomography Classification Systems for Diabetic Macular Edema and Their Associations With Visual Outcome and Treatment Responses - An Updated Review. *Asia Pac J Ophthalmol (Phila)* **11**, 247–257 (2022).
2. Hood, D. C. *et al.* Detecting glaucoma with only OCT: Implications for the clinic, research, screening, and AI development. *Prog Retin Eye Res* **90**, 101052 (2022).
3. Virgili, G. *et al.* Optical coherence tomography (OCT) for detection of macular oedema in patients with diabetic retinopathy. *Cochrane Database Syst Rev* **1**, CD008081 (2015).
4. Wagner, S. K. *et al.* Insights into Systemic Disease through Retinal Imaging-Based Oculomics. *Transl Vis Sci Technol* **9**, 6 (2020).
5. Bostan, M. *et al.* Combining retinal structural and vascular measurements improves discriminative power for multiple sclerosis patients. *Ann N Y Acad Sci* (2023) doi:10.1111/nyas.15060.
6. Chen, S. *et al.* The association between retina thinning and hippocampal atrophy in Alzheimer's disease and mild cognitive impairment: a meta-analysis and systematic review. *Front Aging Neurosci* **15**, 1232941 (2023).
7. Wagner, S. K. *et al.* Retinal Optical Coherence Tomography Features Associated With Incident and Prevalent Parkinson Disease. *Neurology* (2023) doi:10.1212/WNL.0000000000207727.
8. Aytulun, A. *et al.* APOSTEL 2.0 Recommendations for Reporting Quantitative Optical Coherence Tomography Studies. *Neurology* **97**, 68–79 (2021).
9. Cruz-Herranz, A. *et al.* The APOSTEL recommendations for reporting quantitative optical coherence tomography studies. *Neurology* **86**, 2303–9 (2016).

10. Chen, C. *et al.* Intraocular robotic interventional surgical system (IRISS): Semi-automated OCT-guided cataract removal. *The International Journal of Medical Robotics and Computer Assisted Surgery* **14**, (2018).
11. Sharma, R. *et al.* Application of anterior segment optical coherence tomography in glaucoma. *Surv Ophthalmol* **59**, 311–327 (2014).
12. Santos, V. A. dos *et al.* CorneaNet: fast segmentation of cornea OCT scans of healthy and keratoconic eyes using deep learning. *Biomed Opt Express* **10**, 622 (2019).
13. Etherton, K. *et al.* Quantitative and qualitative assessment of anterior segment optical coherence tomography capture of disease state in childhood anterior uveitis. *Br J Ophthalmol* **107**, 966–972 (2023).
14. Tsui, E. *et al.* Quantification of Anterior Chamber Cells in Children With Uveitis Using Anterior Segment Optical Coherence Tomography. *Am J Ophthalmol* **241**, 254–261 (2022).
15. Flaxman, S. R. *et al.* Global causes of blindness and distance vision impairment 1990–2020: a systematic review and meta-analysis. *Lancet Glob Health* **5**, e1221–e1234 (2017).
16. Xie, X. *et al.* Age- and refraction-related changes in anterior segment anatomical structures measured by swept-source anterior segment OCT. *PLoS One* **15**, e0240110 (2020).
17. Gattrell, W. T. *et al.* ACCORD guideline for reporting consensus-based methods in biomedical research and clinical practice: a study protocol. *Res Integr Peer Rev* **7**, 3 (2022).
18. Solebo, A. L. *et al.* Areas of agreement in the management of childhood non-infectious chronic anterior uveitis in the UK. *British Journal of Ophthalmology* **104**, 11–16 (2020).
19. Solebo, A. L. *et al.* Development of a Nationally Agreed Core Clinical Dataset for Childhood Onset Uveitis. *Front Pediatr* **10**, (2022).
20. Tewarie, P. *et al.* The OSCAR-IB Consensus Criteria for Retinal OCT Quality Assessment. *PLoS One* **7**, e34823 (2012).
21. Petzold, A. *et al.* Artificial intelligence extension of the OSCAR-IB criteria. *Ann Clin Transl Neurol* **8**, 1528–1542 (2021).
22. Akbarali, S. *et al.* Imaging-Based Uveitis Surveillance in Juvenile Idiopathic Arthritis: Feasibility, Acceptability, and Diagnostic Performance. *Arthritis Rheumatol* **73**, 330–335 (2021).

Supplemental document overleaf

## Supp 1: Literature search strategy

The following databases will be searched:

Medline

Embase

CINAHL

The search strategy will comprise searches of these terms:

|    |                                                                                                                                                                                                                                                                                                          |
|----|----------------------------------------------------------------------------------------------------------------------------------------------------------------------------------------------------------------------------------------------------------------------------------------------------------|
| #1 | <b>anterior eye segments</b><br>"anterior eye segment"[MeSH Terms] OR ("anterior"[All Fields] AND "eye"[All Fields] AND "segment"[All Fields]) OR "anterior eye segment"[All Fields]                                                                                                                     |
| #2 | <b>optical coherence tomography</b><br>"tomography, optical coherence"[MeSH Terms] OR ("tomography"[All Fields] AND "optical"[All Fields] AND "coherence"[All Fields]) OR "optical coherence tomography"[All Fields] OR ("optical"[All Fields] AND "coherence"[All Fields] AND "tomography"[All Fields]) |
| #3 | #1 AND #2                                                                                                                                                                                                                                                                                                |
| #4 | <b>anterior segment optical coherence</b><br>("anterior"[All Fields] OR "anteriores"[All Fields] OR "anteriorization"[All Fields] OR "anteriorized"[All Fields] OR "anteriors"[All Fields]) AND ("segment"[All Fields] OR "segment s"[All Fields] OR "segmental"[All Fields] OR "segmentally"[All        |

|    |                                                                                                                                                                                                                                                                                                                                                                                                                                                                                                                                                                                                                                   |
|----|-----------------------------------------------------------------------------------------------------------------------------------------------------------------------------------------------------------------------------------------------------------------------------------------------------------------------------------------------------------------------------------------------------------------------------------------------------------------------------------------------------------------------------------------------------------------------------------------------------------------------------------|
|    | <p>Fields] OR "segmentals"[All Fields] OR "segmentation"[All Fields] OR "segmentational"[All Fields] OR "segmentations"[All Fields] OR "segmented"[All Fields] OR "segmenter"[All Fields] OR "segmenters"[All Fields] OR "segmenting"[All Fields] OR "segments"[All Fields]) AND ("eye"[MeSH Terms] OR "eye"[All Fields] OR "optic"[All Fields] OR "optic s"[All Fields] OR "optical"[All Fields] OR "optically"[All Fields] OR "optics"[All Fields]) AND ("coherence"[All Fields] OR "coherences"[All Fields] OR "coherencies"[All Fields] OR "coherency"[All Fields] OR "coherent"[All Fields] OR "coherently"[All Fields])</p> |
| #5 | <p><b>anterior segment oct</b></p> <p>("anterior"[All Fields] OR "anteriores"[All Fields] OR "anteriorization"[All Fields] OR "anteriorized"[All Fields] OR "anteriors"[All Fields]) AND ("segment"[All Fields] OR "segments"[All Fields] OR "segmental"[All Fields] OR "segmentally"[All Fields] OR "segmentals"[All Fields] OR "segmentation"[All Fields] OR "segmentational"[All Fields] OR "segmentations"[All Fields] OR "segmented"[All Fields] OR "segmenter"[All Fields] OR "segmenters"[All Fields] OR "segmenting"[All Fields] OR "segments"[All Fields]) AND "oct"[All Fields]</p>                                     |
| #6 | #3 OR #4 OR #5                                                                                                                                                                                                                                                                                                                                                                                                                                                                                                                                                                                                                    |
